# Supplementary material
Source: publisher figshare collection journal article supplement (https://tandf.figshare.com/ndownloader/files/35117923)
Supplement: Supplementary file 1 [file 35117923]

**Appendix**

**Item list for the Spanish picture naming task in T1 order**

| **English** | **Spanish** | **German** | **Item Type** | **Cognate**  (0=non-cognate  1= Ger-Eng-Spa  2= Eng-Spa) | **T2 order** | **T3**  **order** |
| --- | --- | --- | --- | --- | --- | --- |
| strawberry | fresa | Erdbeere | Practice | 0 | 4 | 2 |
| tree | arból | Baum | Practice | 0 | 2 | 3 |
| dog | perro | Hund | Practice | 0 | 3 | 1 |
| car | coche | Auto | Practice | 0 | 1 | 4 |
| chocolate | chocolate | Schokolade | Test | 1 | 75 | 17 |
| doll | muñeca | Puppe | Test | 0 | 22 | 83 |
| bike | bicicleta | Fahrrad | Test | 2 | 97 | 25 |
| chair | silla | Stuhl | Test | 0 | 104 | 57 |
| telephone | telefono | Telefon | Test | 1 | 91 | 37 |
| shoe | zapato | Schuh | Test | 0 | 111 | 134 |
| butterfly | mariposa | Schmetterling | Test | 0 | 5 | 46 |
| bus | bus | Bus | Test | 1 | 68 | 48 |
| shark | tiburón | Hai | Test | 0 | 49 | 59 |
| lightbulb | bombilla | Glühbirne | Test | 0 | 126 | 79 |
| table | mesa | Tisch | Test | 0 | 98 | 69 |
| bottle | botella | Flasche | Test | 2 | 7 | 12 |
| skirt | falda | Rock | Test | 0 | 46 | 75 |
| fingernail | uña | Fingernagel | Test | 0 | 62 | 52 |
| suit | traje | Anzug | Test | 0 | 85 | 32 |
| lemon | limón | Zitrone | Test | 2 | 125 | 81 |
| glove | guante | Handschuh | Test | 0 | 51 | 125 |
| can | lata | Blechdose | Test | 0 | 115 | 114 |
| watch | reloj | Armbanduhr | Test | 0 | 102 | 54 |
| pearl | perla | Perle | Test | 1 | 20 | 76 |
| bellpepper | pimiento | Paprika | Test | 0 | 106 | 102 |
| garlic | ajo | Knoblauch | Test | 0 | 32 | 123 |
| sleeve | manga | Ärmel | Test | 0 | 93 | 35 |
| circle | circulo | Kreis | Test | 2 | 28 | 124 |
| crutch | muleta | Krücke | Test | 0 | 13 | 15 |
| heel | tacón | (Schuh)absatz | Test | 0 | 120 | 126 |
| pan | sartén | Pfanne | Test | 0 | 59 | 24 |
| pharmacy | farmacia | Apotheke | Test | 2 | 71 | 21 |
| sausage | salchicha | Wurst | Test | 0 | 21 | 47 |
| spoon | cuchara | Löffel | Test | 0 | 110 | 97 |
| screw | tornillo | Schraube | Test | 0 | 108 | 133 |
| tomato | tomate | Tomate | Test | 1 | 25 | 88 |
| key | llave | Schlüssel | Test | 0 | 38 | 36 |
| brocoli | brócoli | Brokkoli | Test | 1 | 121 | 132 |
| duck | pato | Ente | Test | 0 | 135 | 140 |
| flower | flor | Blume | Test | 2 | 80 | 142 |
| knife | cuchillo | Messer | Test | 0 | 48 | 19 |
| map | mapa | (Land)karte | Test | 2 | 79 | 113 |
| apron | delantal | Schürze | Test | 0 | 74 | 121 |
| horse | caballo | Pferd | Test | 0 | 42 | 14 |
| fork | tenedor | Gabel | Test | 0 | 47 | 63 |
| castle | castillo | Burg | Test | 2 | 94 | 95 |
| umbrella | paraguas | Regenschirm | Test | 0 | 89 | 11 |
| suitcase | maleta | Koffer | Test | 0 | 131 | 9 |
| straw | paja | Strohhalm | Test | 0 | 127 | 109 |
| spider | araña | Spinne | Test | 0 | 29 | 86 |
| sofa | sofá | Sofa | Test | 1 | 30 | 73 |
| fan | abanico | Fächer | Test | 0 | 87 | 115 |
| waiter | camarero | Kellner | Test | 0 | 45 | 30 |
| button | botón | Knopf | Test | 2 | 67 | 51 |
| pigeon | paloma | Taube | Test | 0 | 84 | 8 |
| orange | naranja | Orange | Test | 0 | 70 | 70 |
| socket | enchufe | Steckdose | Test | 0 | 8 | 94 |
| salmon | salmón | Lachs | Test | 2 | 90 | 90 |
| scar | cicatriz | Narbe | Test | 0 | 39 | 141 |
| keyboard | teclado | Tastatur | Test | 0 | 12 | 6 |
| plate | plato | Teller | Test | 2 | 37 | 49 |
| ring | anillo | Ring | Test | 0 | 54 | 77 |
| snail | caracol | Schnecke | Test | 0 | 134 | 129 |
| melon | melón | Melone | Test | 1 | 114 | 107 |
| candle | vela | Kerze | Test | 0 | 117 | 41 |
| foot | pie | Fuss | Test | 0 | 10 | 89 |
| lake | lago | See | Test | 2 | 60 | 31 |
| goat | cabra | Ziege | Test | 0 | 11 | 50 |
| hairbrush | cepillo | Haarbürste | Test | 0 | 124 | 80 |
| lettuce | lechuga | Salat | Test | 2 | 56 | 22 |
| kangaroo | canguro | Känguru | Test | 1 | 81 | 139 |
| lock | candado | Schloss | Test | 0 | 105 | 100 |
| calculator | calculador | Taschenrechner | Test | 2 | 35 | 93 |
| blanket | manta | Decke | Test | 0 | 128 | 120 |
| gift | regalo | Geschenk | Test | 0 | 64 | 34 |
| cable | cable | Kabel | Test | 1 | 63 | 99 |
| wave | ola | Welle | Test | 0 | 69 | 78 |
| scarf | bufanda | Schal | Test | 0 | 138 | 111 |
| wardrobe | armario | Schrank | Test | 0 | 122 | 42 |
| envelope | sobre | Briefumschlag | Test | 0 | 17 | 127 |
| tap | grifo | Wasserhahn | Test | 0 | 34 | 117 |
| elephant | elefante | Elefant | Test | 1 | 142 | 5 |
| rug | alfombra | Teppich | Test | 0 | 119 | 38 |
| shell | concha | Muschel | Test | 0 | 118 | 106 |
| needle | aguja | Nadel | Test | 0 | 31 | 64 |
| lion | león | Löwe | Test | 2 | 72 | 10 |
| bellybutton | ombligo | Bauchnabel | Test | 0 | 41 | 7 |
| broom | escoba | Besen | Test | 0 | 23 | 16 |
| onion | cebolla | Zwiebel | Test | 0 | 143 | 84 |
| cross | cruz | Kreuz | Test | 1 | 113 | 29 |
| egg | huevo | Ei | Test | 0 | 86 | 28 |
| screen | pantalla | Bildschirm | Test | 0 | 50 | 55 |
| cow | vaca | Kuh | Test | 0 | 44 | 66 |
| iron | plancha | Bügeleisen | Test | 0 | 58 | 119 |
| sandal | sandalia | Sandale | Test | 1 | 36 | 62 |
| cloud | nube | Wolke | Test | 0 | 73 | 105 |
| bridge | puente | Brücke | Test | 0 | 136 | 131 |
| soap | jabón | Seife | Test | 0 | 76 | 144 |
| whale | ballena | Wal | Test | 0 | 140 | 61 |
| pig | cerdo | Schwein | Test | 0 | 116 | 122 |
| boot | bota | Stiefel | Test | 2 | 16 | 82 |
| bone | hueso | Knochen | Test | 0 | 123 | 74 |
| leg | pierna | Bein | Test | 0 | 99 | 20 |
| radio | radio | Radio | Test | 1 | 137 | 87 |
| earring | pendiente | Ohrring | Test | 0 | 78 | 33 |
| hospital | hospital | Krankenhaus | Test | 2 | 144 | 44 |
| peanut | cacahuete | Erdnuss | Test | 0 | 40 | 45 |
| feather | pluma | Feder | Test | 0 | 53 | 138 |
| seagull | gaviota | Möwe | Test | 0 | 55 | 116 |
| Vacuum cleaner | aspirador/a | Staubsauger | Test | 0 | 18 | 104 |
| ashtray | cenicero | Aschenbecher | Test | 0 | 109 | 136 |
| nose | naríz | Nase | Test | 0 | 112 | 27 |
| potato | patata | Kartoffel | Test | 2 | 96 | 137 |
| cage | jaula | Käfig | Test | 0 | 77 | 128 |
| pineapple | piña | Ananas | Test | 0 | 83 | 43 |
| goal | gol | Tor | Test | 2 | 130 | 92 |
| carrot | zanahoria | Möhre | Test | 0 | 133 | 56 |
| mirror | espejo | Spiegel | Test | 0 | 141 | 96 |
| lamp | lámpara | Lampe | Test | 1 | 100 | 68 |
| stamp | sello | Briefmarke | Test | 0 | 61 | 135 |
| monkey | mono | Affe | Test | 2 | 95 | 85 |
| truck | camión | Lastwagen | Test | 0 | 103 | 65 |
| salt | sal | Salz | Test | 1 | 88 | 40 |
| bracelet | pulsera | Armband | Test | 0 | 101 | 91 |
| pencil | lápiz | Bleistift | Test | 0 | 15 | 13 |
| island | isla | Insel | Test | 1 | 66 | 53 |
| dress | vestido | Kleid | Test | 0 | 65 | 23 |
| backpack | mochila | Rucksack | Test | 0 | 52 | 39 |
| eyebrow | ceja | Augenbraue | Test | 0 | 26 | 112 |
| frog | rana | Frosch | Test | 0 | 82 | 98 |
| hand | mano | Hand | Test | 0 | 107 | 110 |
| bear | oso | Bär | Test | 0 | 139 | 67 |
| train | tren | Zug | Test | 2 | 9 | 60 |
| pacifier | chupete | Schnuller | Test | 0 | 92 | 71 |
| pumpkin | calabaza | Kürbis | Test | 0 | 129 | 18 |
| pillow | almohada | Kissen | Test | 0 | 132 | 101 |
| banana | banana | Banane | Test | 1 | 24 | 58 |
| trafficlight | semáforo | Ampel | Test | 0 | 27 | 108 |
| eggplant | berenjena | Aubergine | Test | 0 | 6 | 26 |
| battery | batería | Batterie | Test | 1 | 14 | 103 |
| belt | cinturón | Gürtel | Test | 0 | 43 | 130 |
| mountain | montaña | Berg | Test | 2 | 19 | 118 |
| blackberry | mora | Brombeere | Test | 0 | 57 | 143 |
| cauliflower | coliflor | Blumenkohl | Test | 2 | 33 | 72 |
